# Supplementary material for: Aptamers with Self-Loading Drug Payload and pH-Controlled Drug Release for Targeted Chemotherapy
Source: MDPI journal article supplement (doi:10.3390/pharmaceutics13081221), 2021-08-07
Supplement: s1 [file s1]

# Supplementary Material: Aptamers with Self-Loading Drug Payload and pH-Controlled Drug Release for Targeted Chemotherapy

Zihua Zeng, Jianjun Qi, Quanyuan Wan and Youli Zu

## Materials and Methods

### *General information of chemistry experiments*

All reagents were purchased from Sigma-Aldrich (St. Louis, MO) and used without further purification. Column chromatography was performed on silica gel 60 (70-230 Mesh). Analytical thin-layer chromatography (TLC) was conducted on glass plates coated with silica gel 60 (F-254). Proton (<sup>1</sup>H) and Carbon (<sup>13</sup>C) NMR spectra were obtained on a Bruker 300 MHz magnetic resonance spectrometer using TMS as internal standard. NMR chemical shifts (δ) are reported in ppm. Mass spectra (ESI-MS data) were collected on an LCQ Fleet™ Ion Trap Mass Spectrometer (Thermo, USA).

## Experimental Section

### *Synthesis and characterization*

*Di-tert-butyl 3,3'-((2-amino-2-((3-(tert-butoxy)-3-oxopropoxy)methyl)propane-1,3-diyl)bis(oxy))dipropionate* (compound 2)<sup>[1]</sup>. A flask containing a solution of tris base (1.21 g, 10.0 mmol) in DMSO (2 mL) was flushed by nitrogen, followed by addition of 5N NaOH (0.2 mL) with a syringe, and tert-butyl acrylate (5.0 mL, 34 mmol) was added dropwise at 0°C. The reaction solution was allowed to reach room temperature (RT) and then incubated overnight with stirring. The resulting compounds were extracted with EtOAc and washed with brine. The organic layer was dried with sodium sulfate and the solvent was removed under reduced pressure. The raw compound was further purified with a silica gel column, eluted with EtOAc/Hexane=1/1, and yielded 2.54 g of compound 2 as a colorless oil with a yield of 50.3%. TLC: R<sub>f</sub>=0.4 (EtOAc). <sup>1</sup>H NMR (CDCl<sub>3</sub>, 300 MHz): δ 1.45 (s, (CH<sub>3</sub>)<sub>3</sub>C, 27H); 2.46 (t, CH<sub>2</sub>CO, J=6.4 Hz, 6H); 3.32 (s, CCH<sub>2</sub>O, 6H); 3.65 (t, OCH<sub>2</sub>CH<sub>2</sub>, J=6.4 Hz, 6H) (Figure S2). <sup>13</sup>C NMR (CDCl<sub>3</sub>, 75 MHz): δ 170.94, 80.43, 72.88, 67.13, 55.95, 36.33, 28.11 (Figure S3). ESI-MS: 506 (M+H)<sup>+</sup> (Figure S1).

*Di-tert-butyl 3,3'-((2-(((9H-fluoren-9-yl)methoxy)carbonyl)amino)-2-((3-(tert-butoxy)-3-oxopropoxy)methyl)propane-1,3-diyl)bis(oxy))dipropionate* (compound 3)<sup>[2]</sup>. Compound 2 (505 mg, 1 mmol) was dissolved in a mixture solvent of 1,4-dioxane (5 mL) and 10% NaHCO<sub>3</sub> aqueous solution (3 mL), followed addition of Fmoc-Cl (257 mg, 1 mmol). The reaction solution was stirred at RT overnight. Then, the reaction solution was extracted with ethyl acetate, washed with brine, and dried over sodium sulfate. The solvent was removed under reduced pressure. The residue was purified with a silica gel column, eluted with hexane/ethyl acetate from 4/1 to 2/1 to give 0.65 g of compound 3 with a yield of 89.4%. TLC: R<sub>f</sub>=0.54, Hexane/EtOAc=2/1. <sup>1</sup>H NMR (CDCl<sub>3</sub>, 300 MHz): δ 1.44 (s, (CH<sub>3</sub>)<sub>3</sub>C, 27H); 2.45 (t, CH<sub>2</sub>CH<sub>2</sub>O, J= 6.2 Hz, 6H); 3.65 (m, OCH<sub>2</sub>CH<sub>2</sub>, 12H); 4.5-4.1 (m, 3H); 5.36 (bs, NH, 1H); 7.29 (td, 2H, J<sub>1</sub>=7.2 Hz, J<sub>2</sub>=1.2Hz), 7.63 (d, 2H, J=7.2Hz), 7.76 (d, 2H, J=7.2Hz) (Figure S5). <sup>13</sup>C NMR (CDCl<sub>3</sub>, 75 MHz): δ 170.85, 144.13, 141.27, 127.60, 127.06, 125.21, 125.21, 119.90, 80.47, 69.33, 67.07, 66.36, 58.78, 47.24, 36.23, 28.10 (Figure S6). ESI-MS: 750 (M+Na)<sup>+</sup> (Figure S4).

*3,3'-((2-(((9H-fluoren-9-yl)methoxy)carbonyl)amino)-2-((2-carboxyethoxy)methyl)propane-1,3-diyl)bis(oxy))dipropionic acid* (compound 4)<sup>[3]</sup>. To compound 3 (3.07g, 4.22 mmol), 32 mL of 95% TFA-5% H<sub>2</sub>O solvent was added and stirred at RT for 1 h. The solvent was removed under reduced pressure and produced compound 4 as a colorless oil. The residue was directly used in next step reaction without further purification. The sample to be

used for NMR analysis was purified using semi-preparative HPLC. TLC:  $R_f$ =0.54, hexane/ethyl acetate=2/1.  $^1\text{H}$  NMR ( $\text{CD}_3\text{OD}$ , 300 MHz):  $\delta$  2.48 (s,  $\text{CH}_2\text{CH}_2\text{O}$ , 6H); 3.65 (s,  $\text{OCH}_2\text{CH}_2$ , 12H); 4.5–4.1 (m, 3H); 7.45–7.25 (m, 4H), 7.65 (d, 2H,  $J$ =7.3Hz), 7.80 (d, 2H,  $J$ =7.3Hz) (Figure S8).  $^{13}\text{C}$  NMR ( $\text{CD}_3\text{OD}$ , 75 MHz):  $\delta$  174.05, 144.07, 141.26, 127.37, 126.85, 124.76, 119.58, 68.72, 66.64, 65.94, 34.33 (Figure S9). ESI-MS: 582 ( $\text{M}+\text{Na}$ ) $^+$  (Figure S7).

Di-*tert*-butyl 9-((((9H-fluoren-9-yl)methoxy)carbonyl)amino)-9-((3-(2-(*tert*-butoxycarbonyl)hydrazineyl)-3-oxopropoxy)methyl)-4,14-dioxo-7,11-dioxo-2,3,15,16-tetraazaheptadecanedioate (compound 5). To the residue (compound 4) DMF (23 mL), DIEPA (5 mL) and HBTU (5.0 g, 13.2 mmol) were added and stirred at RT for 1 h. Then, *tert*-buty carbazate (2.0 g, 15.15 mmol) was added with continued stirring at RT overnight. After the reaction was completed, the solvent was removed under reduced pressure. The residue was extracted with ethyl acetate, washed with brine, and dried over sodium sulfate. After removing the solvent, the residue was purified with a silica gel column and eluted with ethyl acetate/methanol=10/1 to give 2.3 g of pure compound 5 with a yield of 60.5%. TLC:  $R_f$ =0.54, Hexane/Ethyl acetate=2/1.  $^1\text{H}$  NMR ( $\text{CDCl}_3$ , 300 MHz):  $\delta$  1.45 (s, 27H), 2.48 (s,  $\text{CH}_2\text{CH}_2\text{O}$ , 6H); 3.72 (s,  $\text{OCH}_2\text{CH}_2$ , 12H); 4.5–4.1 (m, 3H); 5.41 (s, 1H), 6.86 (s, 3H), 7.30 (t, 2H), 7.41 (t, 2H), 7.60 (d, 2H,  $J$ =7.3Hz), 7.77 (d, 2H,  $J$ =7.3Hz), 8.67 (s, 3H) (Figure S11).  $^{13}\text{C}$  NMR ( $\text{CDCl}_3$ , 75 MHz):  $\delta$  171.20, 155.91, 141.34, 127.74, 127.15, 120.00, 81.82, 70.14, 66.98, 47.21, 34.54, 28.17 (Figure S12). ESI-MS: 924 ( $\text{M}+\text{Na}$ ) $^+$  (Figure S10).

Di-*tert*-butyl 9-amino-9-((3-(2-(*tert*-butoxycarbonyl)hydrazineyl)-3-oxopropoxy)methyl)-4,14-dioxo-7,11-dioxo-2,3,15,16-tetraazaheptadecanedioate (compound 6). Compound 5 (2.48 g, 2.75 mmol) was dissolved in DCM (16 mL) and 4 mL of piperidine and stirred at RT for 1 h. The solvent was removed under reduced pressure. The residue was purified with a silica gel column, eluted with ethyl acetate/methanol=10/1 to 5/2 to give 1.07 g of compound 6 as a yellow residue with a yield of 57.2%. TLC:  $R_f$ =0.57, ethyl acetate/methanol =5/1.  $^1\text{H}$  NMR ( $\text{CDCl}_3$ , 300 MHz):  $\delta$  1.45 (s, 27H), 2.51 (t,  $\text{CH}_2\text{CH}_2\text{O}$ , 6H,  $J$ =5.4); 3.69 (s,  $\text{OCH}_2\text{CH}_2$ , 6H); 3.83 (t, 6H,  $J$ =5.4Hz), 6.56 (s, 3H), 8.24 (t, 3H), 9.40 (s, 2H) (Figure S14).  $^{13}\text{C}$  NMR ( $\text{CDCl}_3$ , 75 MHz):  $\delta$  172.09, 156.32, 82.32, 69.33, 67.08, 60.24, 34.57, 28.09 (Figure S15). ESI-MS: 680 ( $\text{M}+\text{H}$ ) $^+$ , 702 ( $\text{M}+\text{Na}$ ) $^+$  (Figure S13).

3,3'-((2-amino-2-((3-(2-((*Z*)-1-(4-((4-amino-5-hydroxy-6-methyltetrahydro-2H-pyran-2-yl)oxy)-2,5,12-trihydroxy-7-methoxy-6,11-dioxo-1,2,3,4,6,11-hexahydrotetracen-2-yl)-2-hydroxyethylidene)hydrazineyl)-3-oxopropoxy)methyl)propane-1,3-diyl)bis(oxy))bis(*N'*-((*Z*)-1-(4-((4-amino-5-hydroxy-6-methyltetrahydro-2H-pyran-2-yl)oxy)-2,5,12-trihydroxy-7-methoxy-6,11-dioxo-1,2,3,4,6,11-hexahydrotetracen-2-yl)-2-hydroxyethylidene)propanehydrazide) (compound 1, TNM-DOX)<sup>[4]</sup>. Compound 6 (8 mg, 0.012 mmol) was dissolved in 1 mL of a mixture solvent of trifluoroacetic acid/methylene chloride (1/1) and stirred for 1 h at RT. Then, the solvent was removed under reduced pressure to produce oil in quantitative yield. The residue was used in next step reaction without further purification.

The above residue was added into a mixture solvent of methanol/acetic acid/pyridine (10/0.1/0.1, v/v) (2 mL). DOX (28 mg, 0.048 mmol) was added and the reaction solution was stirred overnight at RT. The reaction mixture was loaded directly onto a Sephadex LH-20 column and eluted with methanol. The first 5-part dark red band (0.5 mL each part) was collected and the solvent was removed using a speedVac concentrator to yield 3.5 mg of compound 1 with a yield of 15.2%. ESI-MS: 1955.7 ( $\text{M}+\text{H}$ ) $^+$ , 978.8 ( $\text{M}+2\text{H}$ ) $^{2+}$ , 652.5 ( $\text{M}+3\text{H}$ ) $^{3+}$  (Figure S16).

#### 4.3. HPLC analysis

HPLC analysis was performed in a Varian 920-LC Liquid Chromatograph (Varian, USA) with a built-in auto-injector and UV-Vis detector. A Kinetex C18 column (100X4.6mm, 2.6 $\mu\text{m}$ , Phenomenex, USA) was used at a flow rate of 1 mL/min; Mobile phase A was 0.1% acetic acid in water; mobile phase B was acetonitrile; linear gradient was from 0 to 8 min, 0–85% of B. HPLC separation was monitored using the UV-Vis detector at 260 nm.

**Reference:**

1. Cardona, C. M.; Gawley, R. E. An improved synthesis of a trifurcated newkome-type monomer and orthogonally protected two-generation dendrons. *J. Org. Chem.* **2002**, *67*, 1411-1413.
2. Maegawa, T.; Fujiwara, Y.; Ikawa, T.; Hisashi, H.; Monguchi, Y.; Sajiki, H. Novel deprotection method of Fmoc group under neutral hydrogenation conditions. *Amino Acids* **2009**, *36*, 493-499.
3. Nagel, L.; Budke, C.; Dreyer, A.; Koop, T.; Sewald, N. Antifreeze glycopeptide diastereomers. *Beilstein J. Org. Chem.* **2012**, *8*, 1657-1667.
4. van der Poll, D. G.; Kieler-Ferguson, H. M.; Floyd, W. C.; Guillaudeu, S. J.; Jerger, K.; Szoka, F. C.; Frechet, J. M. Design, synthesis, and biological evaluation of a robust, biodegradable dendrimer. *Bioconjug. Chem.* **2010**, *21*, 764-773.

# The mass spectrum, $^1\text{H}$ NMR, and $^{13}\text{C}$ NMR spectra of the chemical intermediates

2014-11-16-1\_141110150734 #572 RT: 2.47 AV: 1 NL: 4.33E5  
T: ITMS + c ESI Full ms [100.00-2000.00]

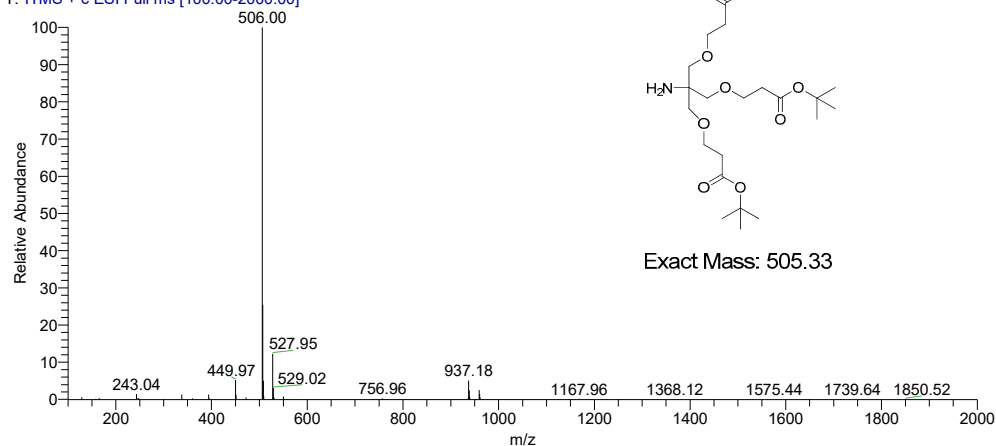

**Figure S1.** The mass spectrum of compound 2.

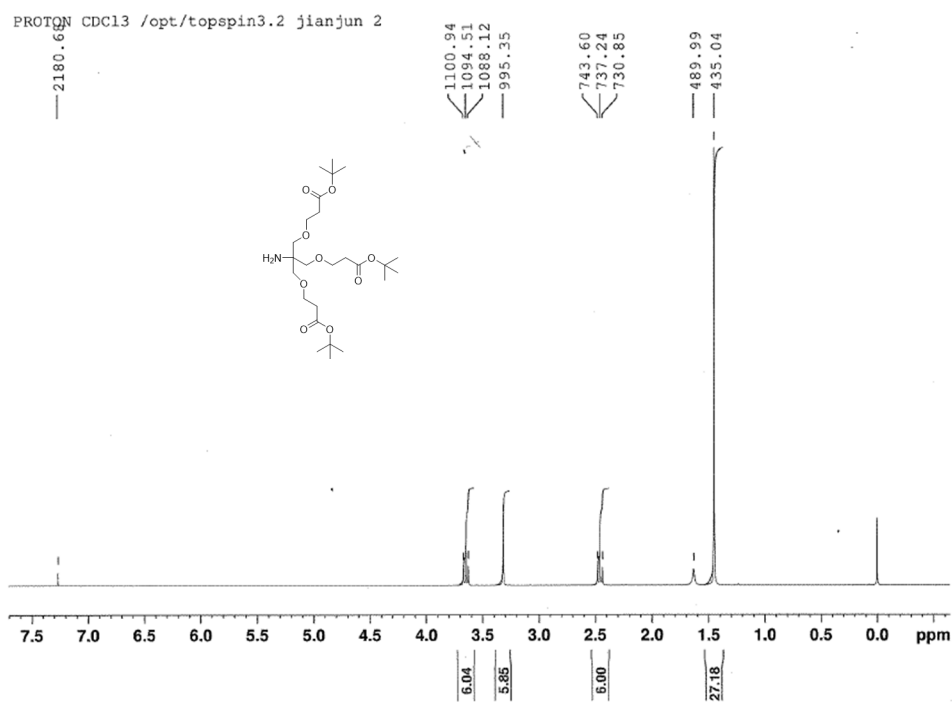

**Figure S2.** The  $^1\text{H}$  NMR spectrum of compound 2.

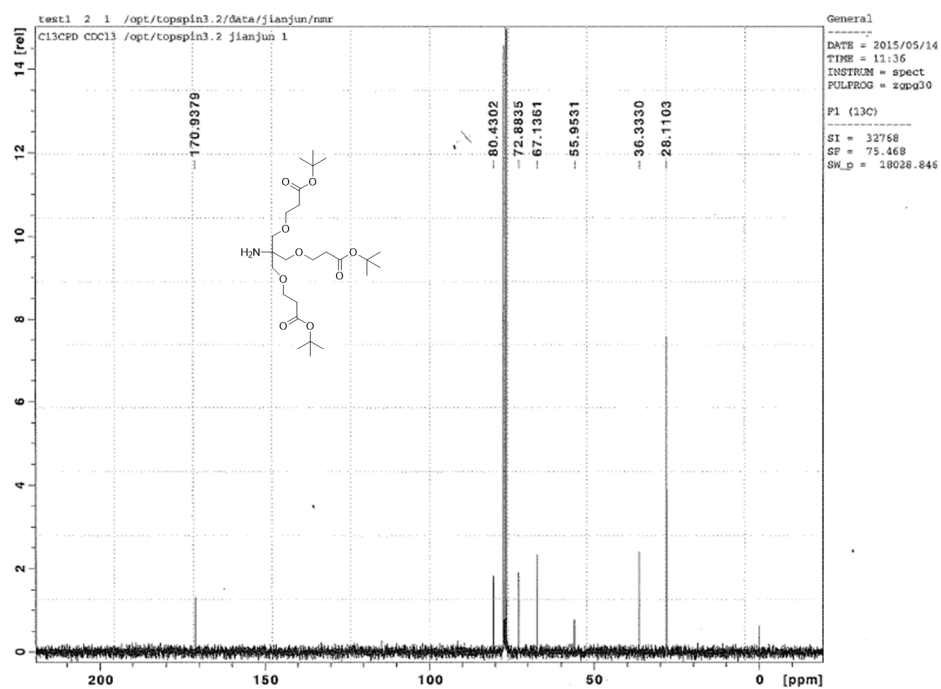

Figure S3. The  $^{13}\text{C}$  NMR spectrum of compound 2.

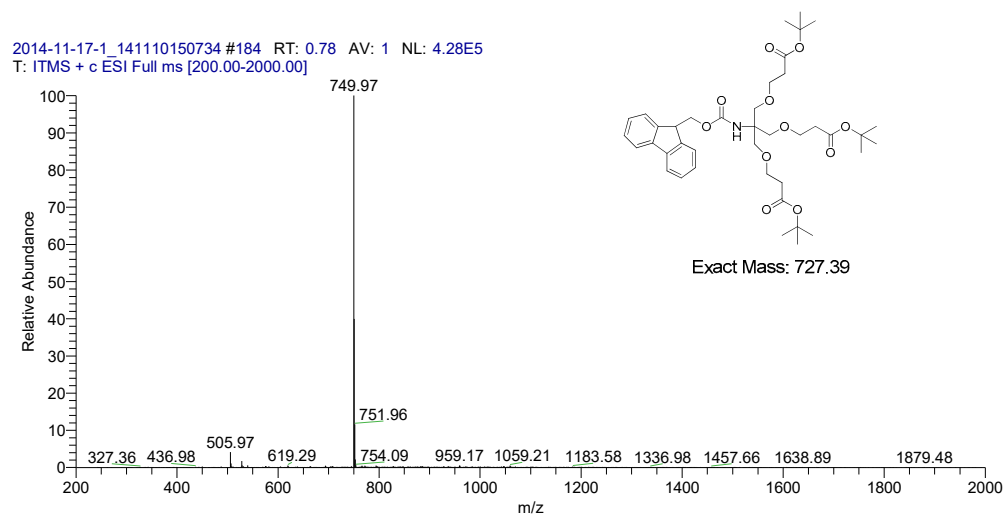

Figure S4. The mass spectrum of compound 3.

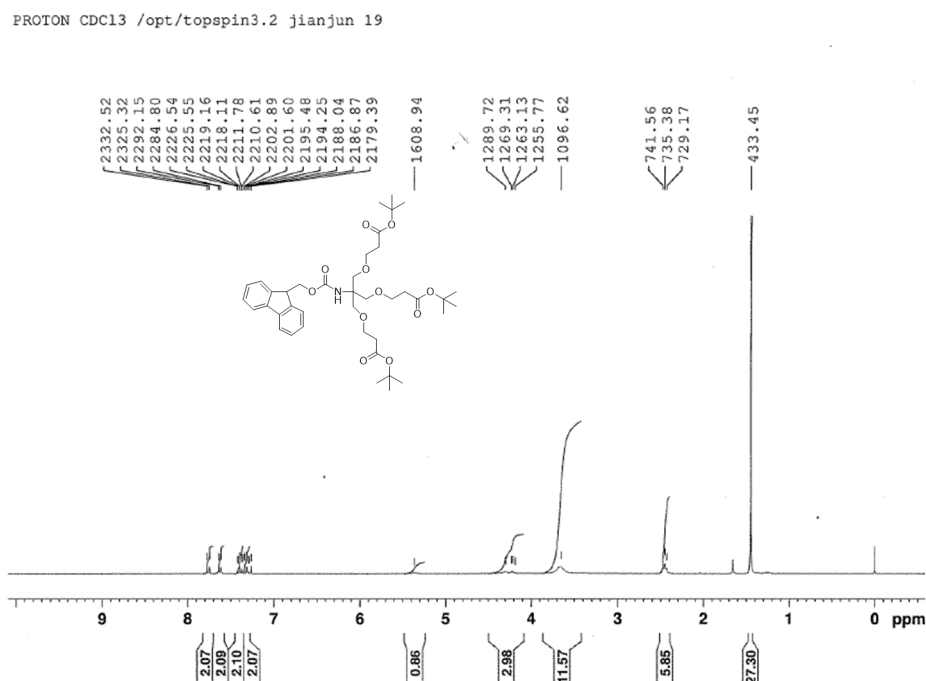Figure S5. The  $^1\text{H}$  NMR spectrum of compound 3.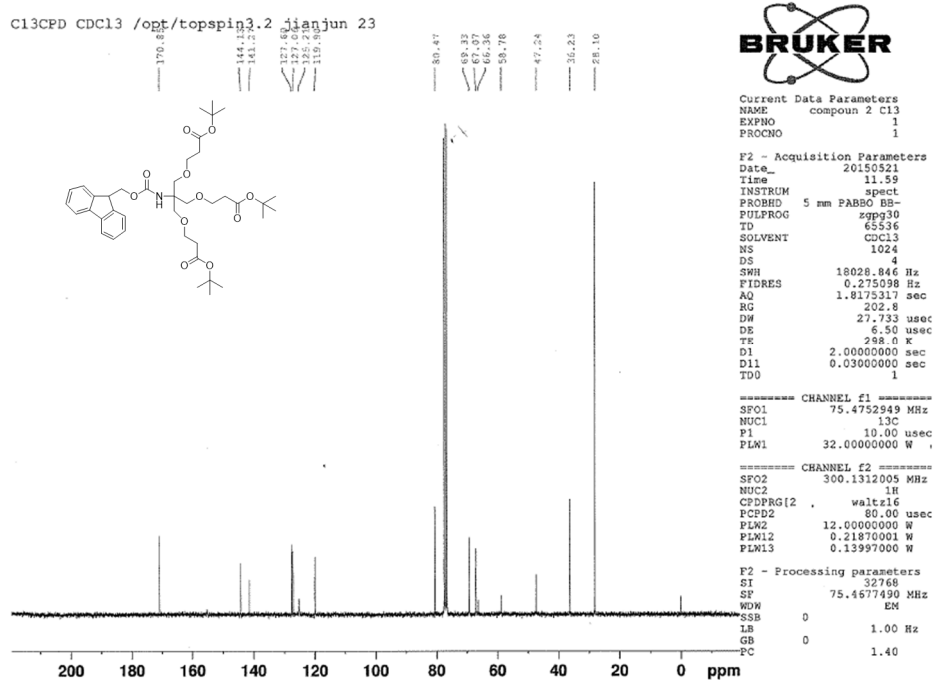Figure S6. The  $^{13}\text{C}$  NMR spectrum of compound 3.

2015-05-25-1\_150312154951 #1 RT: 0.00 AV: 1 NL: 1.04E5  
T: ITMS + c ESI Full ms [100.00-1500.00]

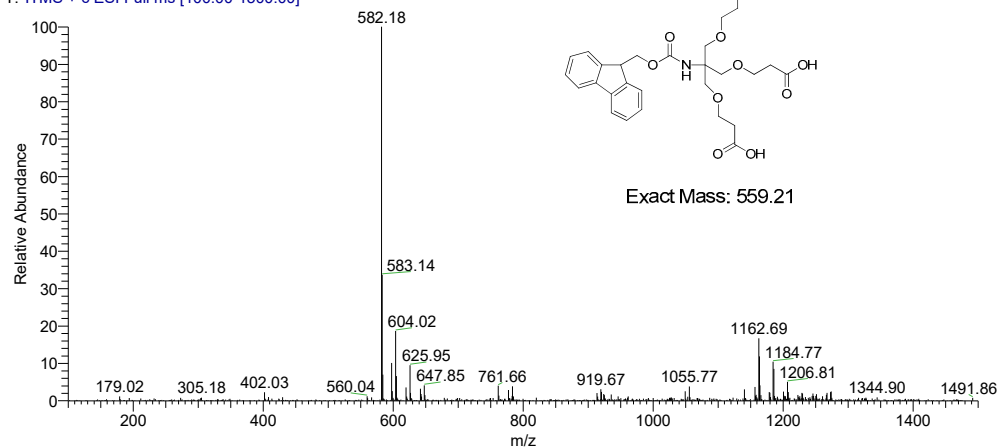

Figure S7. The mass spectrum of compound 4.

PROTON CD3OD\_SPE /opt/topspin3.2 jianjun 31

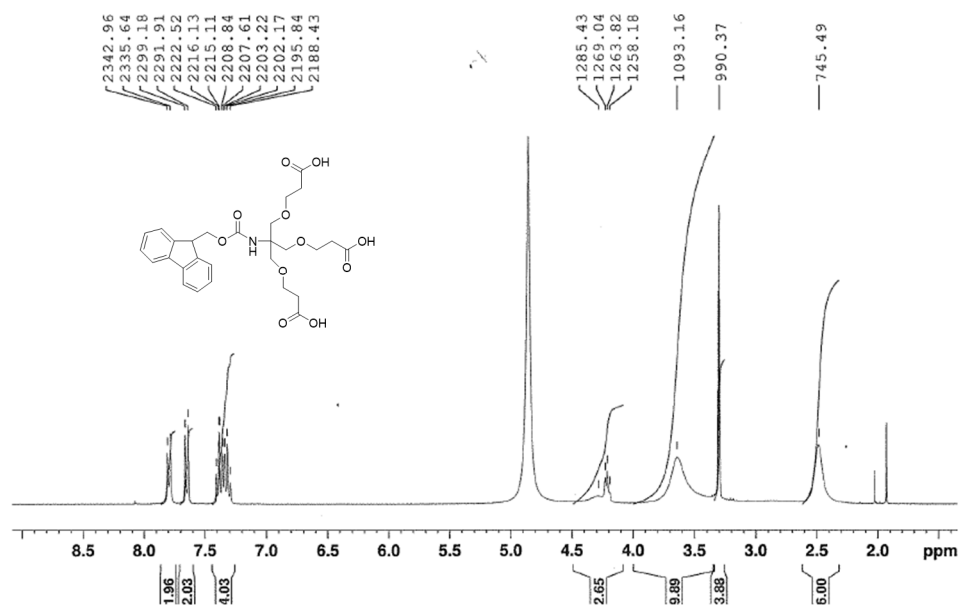

Figure S8. The  $^1\text{H}$  NMR spectrum of compound 4.

C13CPD CD3OD\_SPE /opt/topspin3.2 jianjun 34

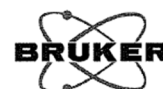

Current Data Parameters  
 NAME compound 3-mH-C13  
 EXPRNO 1  
 PROCNO 1

F2 - Acquisition Parameters  
 Date\_ 20150527  
 Time\_ 11.50  
 INSTRUM spect  
 PROBHD 5 mm PABBO BB-  
 PULPROG zgpg30  
 TD 65536  
 SOLVENT CD3OD\_SPE  
 NS 1024  
 DS 4  
 SWH 18028.846 Hz  
 FIDRES 0.275098 Hz  
 AQ 1.8175317 sec  
 RG 202.8  
 DW 27.733 usec  
 DE 6.50 usec  
 TE 298.0 K  
 D1 2.0000000 sec  
 D11 0.0300000 sec  
 TDO 1

===== CHANNEL f1 =====  
 SFO1 75.4752949 MHz  
 NUC1 13C  
 P1 10.00 usec  
 PLW1 32.0000000 W

===== CHANNEL f2 =====  
 SFO2 300.1312005 MHz  
 NUC2 1H  
 CPDPRG2 waltz16  
 PCD2 80.00 usec  
 PLW2 12.0000000 W  
 PLW12 0.21870001 W  
 PLW13 0.13997000 W

F2 - Processing parameters  
 SI 32768  
 SF 75.4677483 MHz  
 WDW EM  
 SSB 0  
 LB 1.00 Hz  
 GB 0  
 PC 1.40

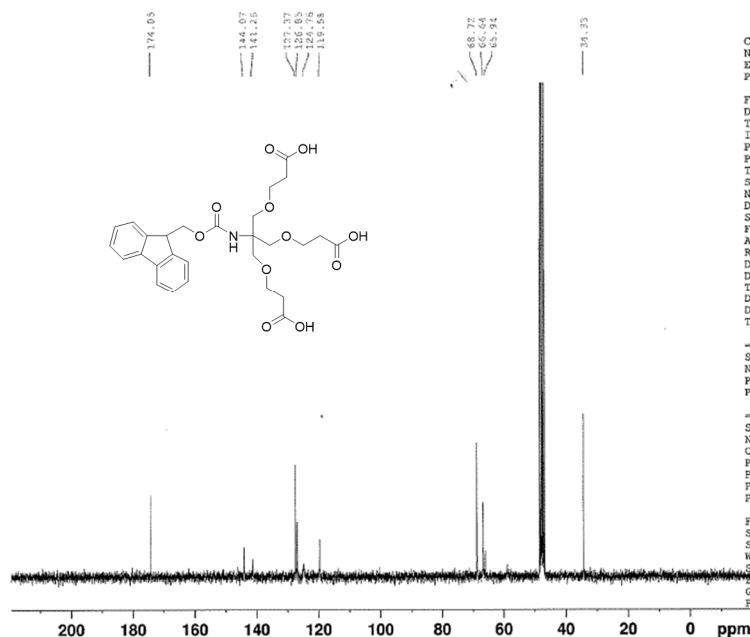Figure S9. The  $^{13}\text{C}$  NMR spectrum of compound 4.

2015-05-22-2 150312154951 #1 RT: 0.00 AV: 1 NL: 4.27E5  
 T: ITMS + c ESI Full ms [100.00-1500.00]

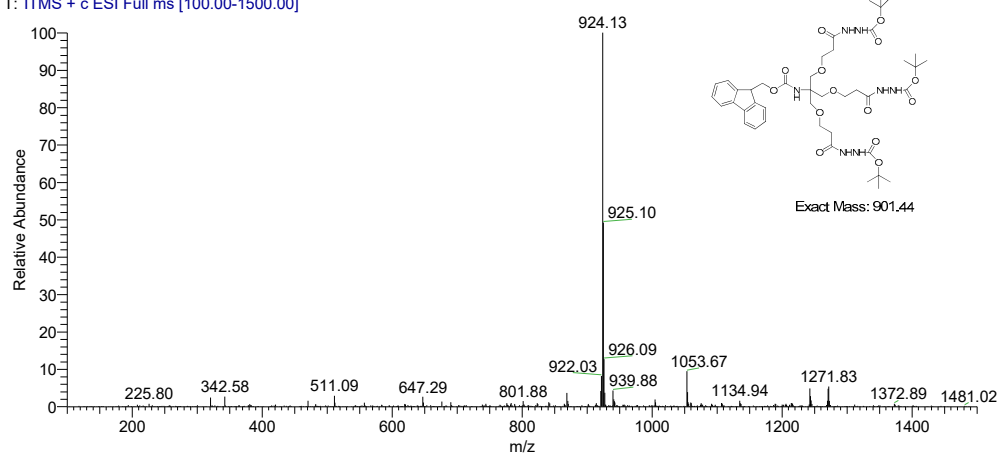

Figure S10. The mass spectrum of compound 5.



PROTON CDC13 /opt/topspin3.2 jianjun 32

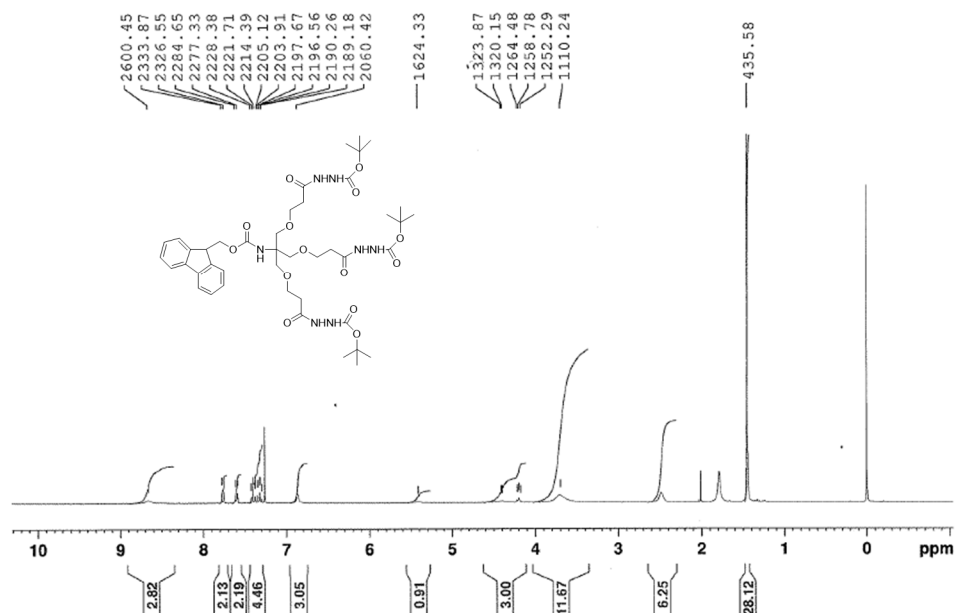

Figure S11. The  $^1\text{H}$  NMR spectrum of compound 5.

C13CPD CDC13 /opt/topspin3.2 jianjun 35

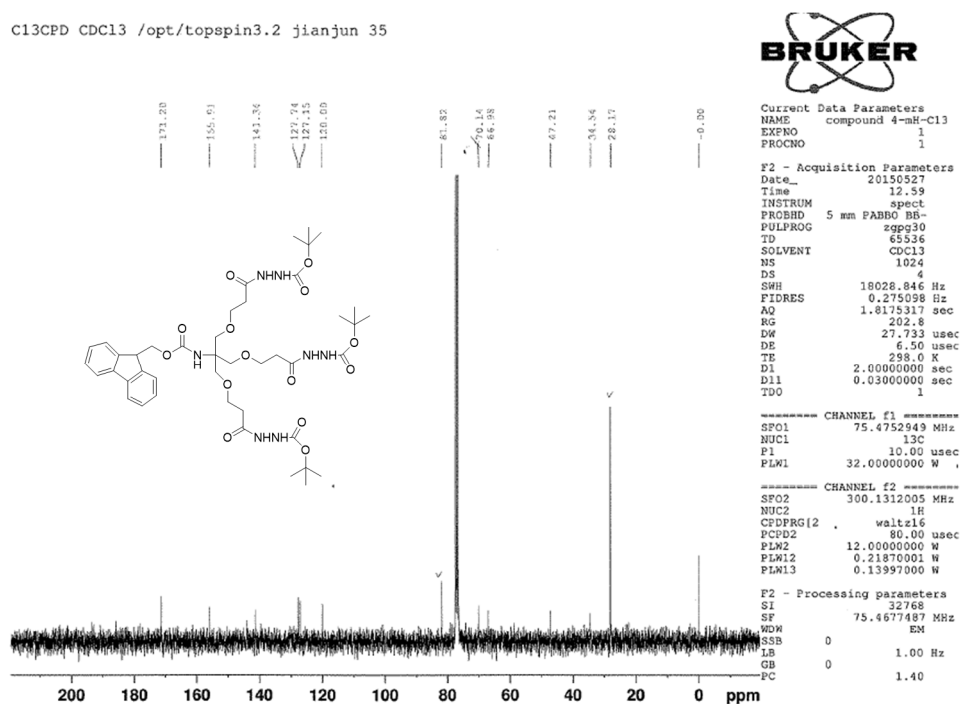

Figure S12. The  $^{13}\text{C}$  NMR spectrum of compound 5.

2015-05-22-1\_150312154951 #154 RT: 1.44 AV: 1 NL: 3.54E5  
T: ITMS + c ESI Full ms [100.00-1200.00]

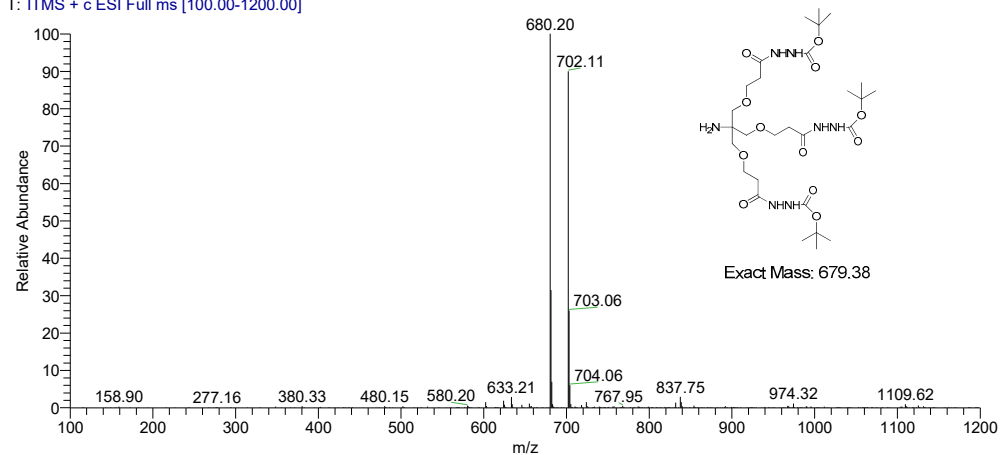

Figure S13. The mass spectrum of compound 6.

PROTON CDC13 /opt/topspin3.2 jianjun 33

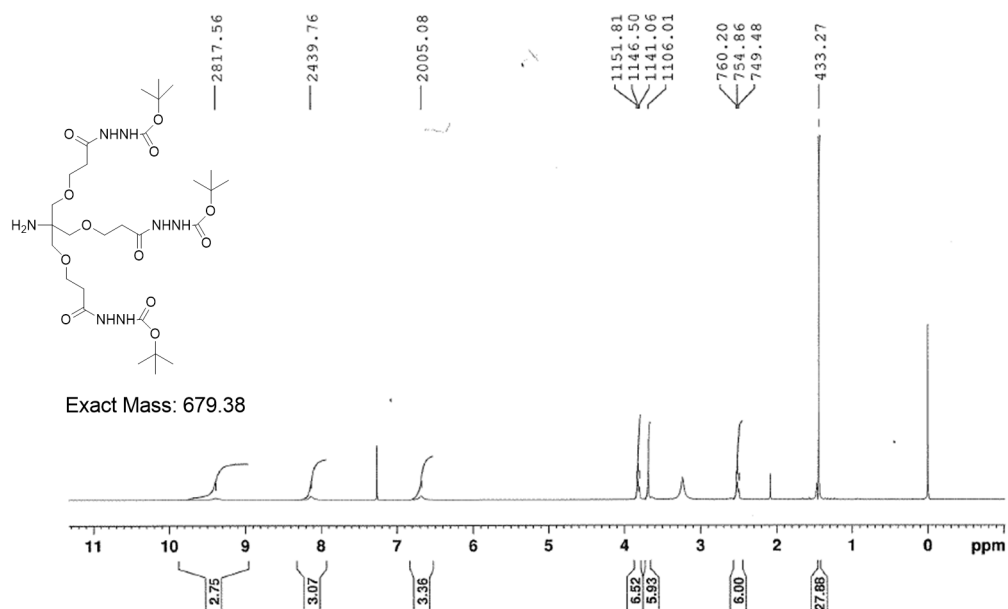

Figure S14. The <sup>1</sup>H NMR spectrum of compound 6.

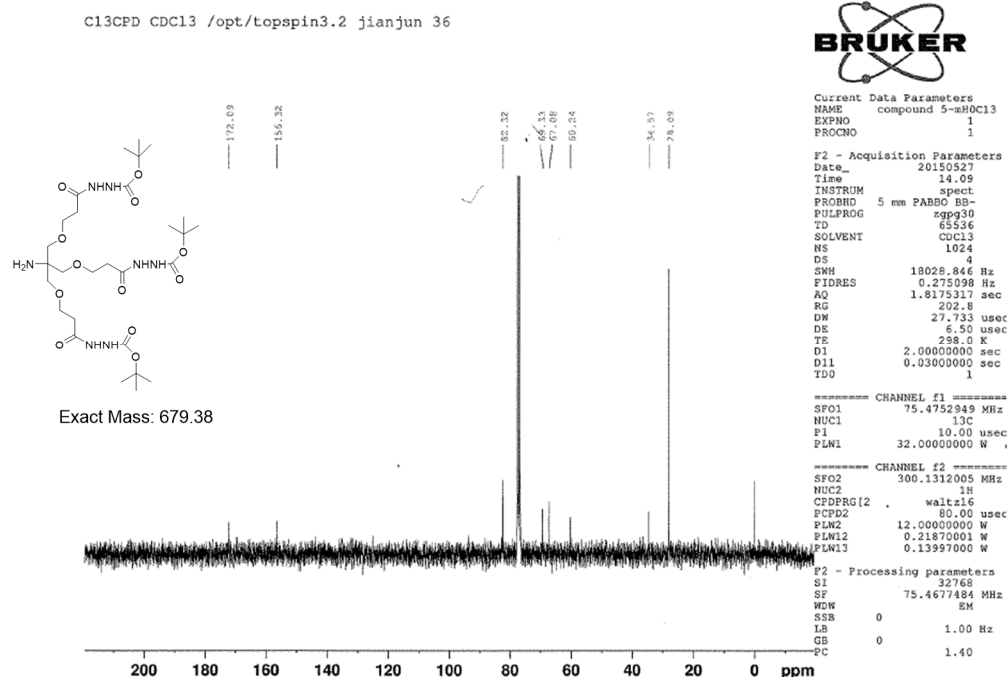Figure S15. The  $^{13}\text{C}$  NMR spectrum of compound 6.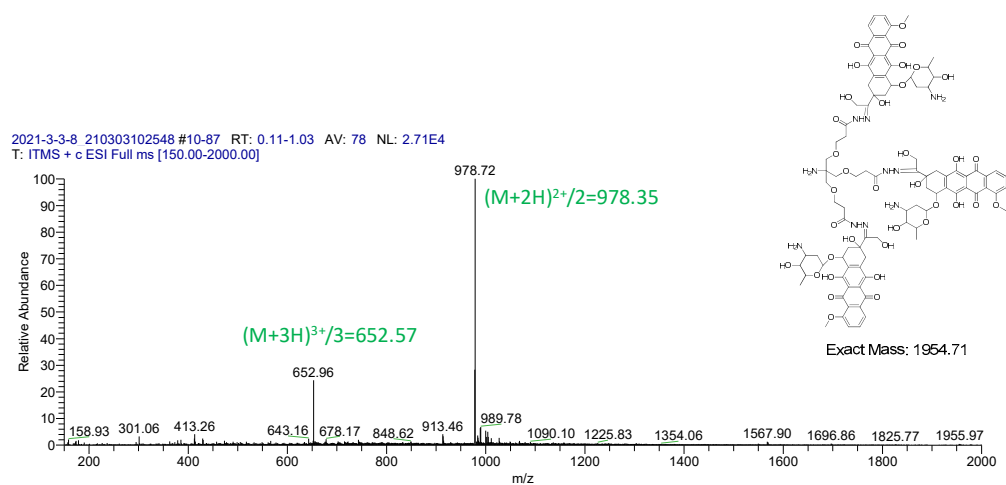

Figure S16. The mass spectrum of TNM-DOX.
